# Supplementary material for: Effect of substituents in novel bioactive tavaborole derivatives on the intermolecular interaction hierarchy
Source: Royal Society of Chemistry journal article supplement (doi:10.1039/d2ce00279e), 2022-01-01
Supplement: d2ce00279e1.pdf [file d2ce00279e1.pdf]

# Effect of substituents in novel bioactive tavaborole derivatives on intermolecular interactions hierarchy

## Electronic Supplementary Information

*Anna M. Dąbrowska<sup>a</sup>, Agnieszka Adamczyk-Woźniak<sup>a</sup> and Izabela D. Madura<sup>\*a</sup>*

<sup>a</sup> *Faculty of Chemistry, Warsaw University of Technology, Noakowskiego 3, 00-664 Warsaw, Poland*

### Contents

|                                                                   |    |
|-------------------------------------------------------------------|----|
| 1. Supplementary figures .....                                    | 2  |
| 2. Supplementary Tables .....                                     | 3  |
| 2.1. Geometrical parameters of the molecules .....                | 5  |
| 2.2. Hydrogen bonds geometry .....                                | 7  |
| 2.3. Hydrogen Bond Propensity Calculations <sup>10,11</sup> ..... | 9  |
| 2.4. Aromatic interactions geometry .....                         | 12 |
| 2.4.1. X···π interactions .....                                   | 12 |
| 2.4.2. π···π interactions .....                                   | 12 |
| 2.4.3. Aromatic Analyzer calculation results <sup>12</sup> .....  | 13 |
| 2.5. Calculated interaction energies .....                        | 15 |
| 3. References .....                                               | 18 |

## 1. Supplementary figures

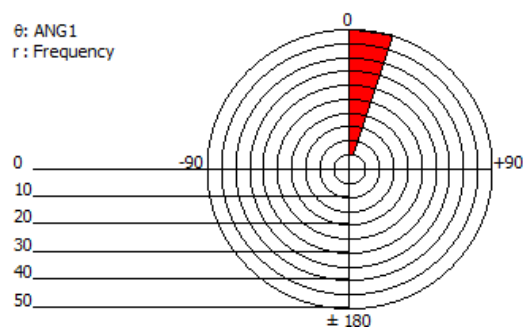

Figure S 1: Crystallographic Structure Database analysis results for observed fold angle in the 9-membered ring of benzoxaborole derivatives

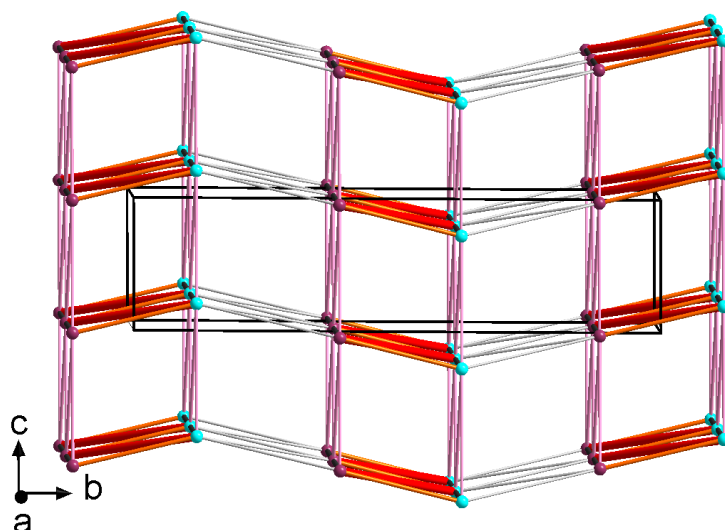

Figure S 2: Large supramolecular synthon graph for **Bx** ( $P2_1$ )

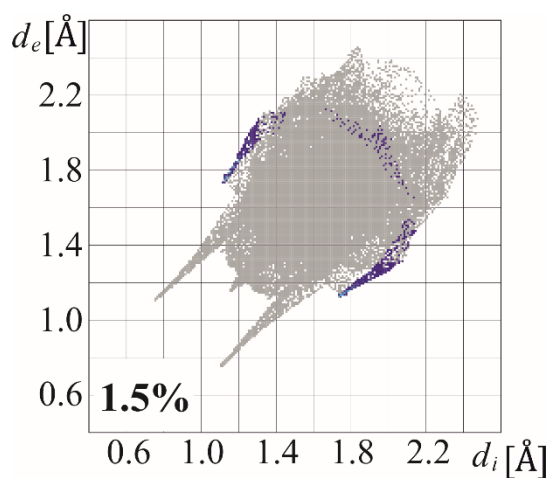

Figure S 3: Resolved fingerprint plots of  $H \cdots B$  weak interactions in **TvO**

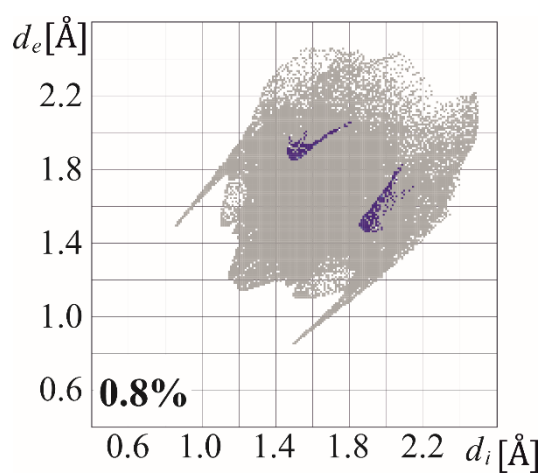

Figure S 4: Resolved fingerprint plots of  $B \cdots O$  weak interactions in **TvS**

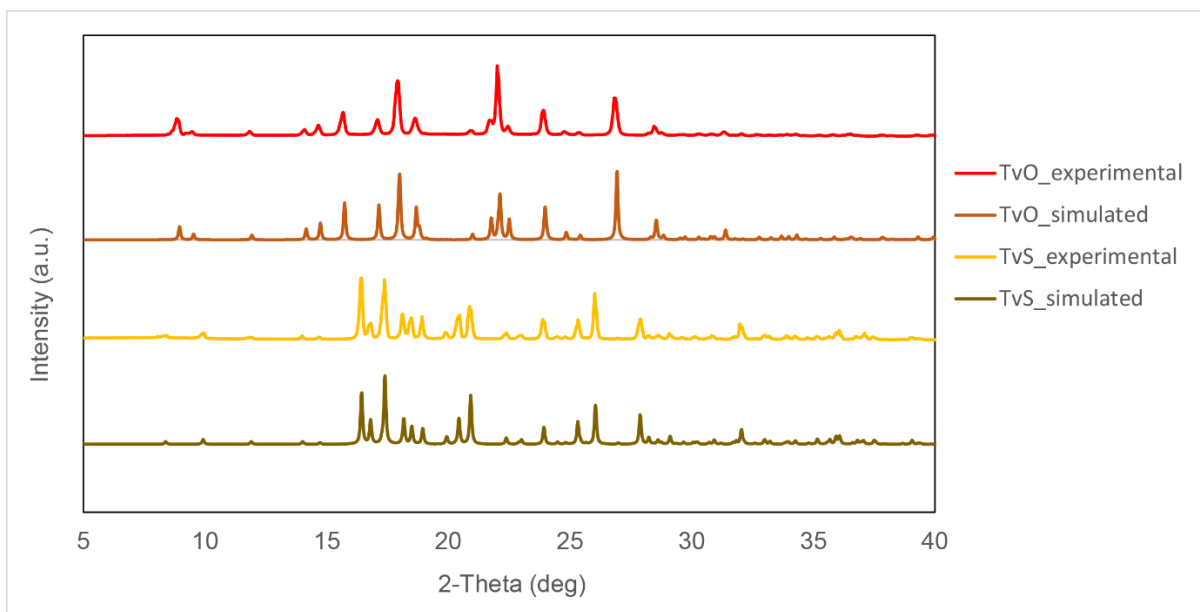

Figure S 5: Powder X-ray diffraction studies of **TvO** and **TvS**: simulated powder patterns from single crystal data and experimental diffractograms for bulk samples.

### DSC-TGA

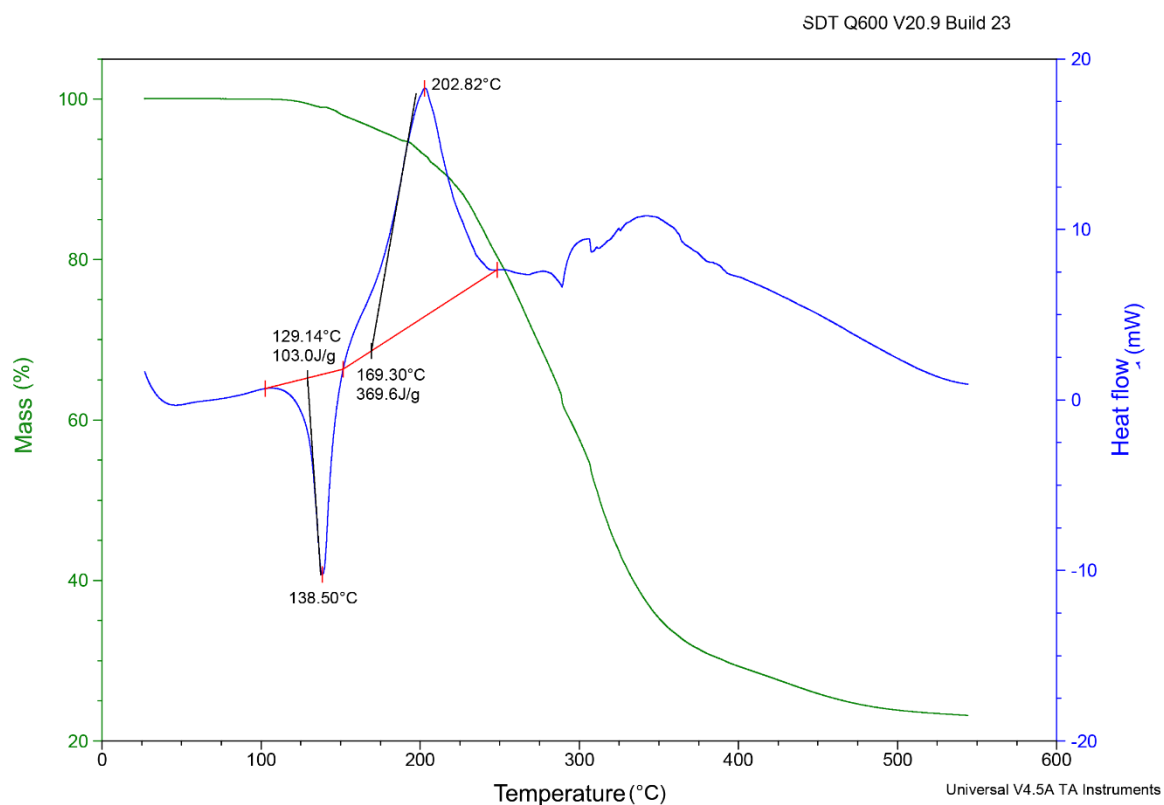

Figure S 6: DSC-TGA analysis of **TvO** under pure nitrogen flow at 100.0 ml/min.

# DSC-TGA

SDT Q600 V20.9 Build 23

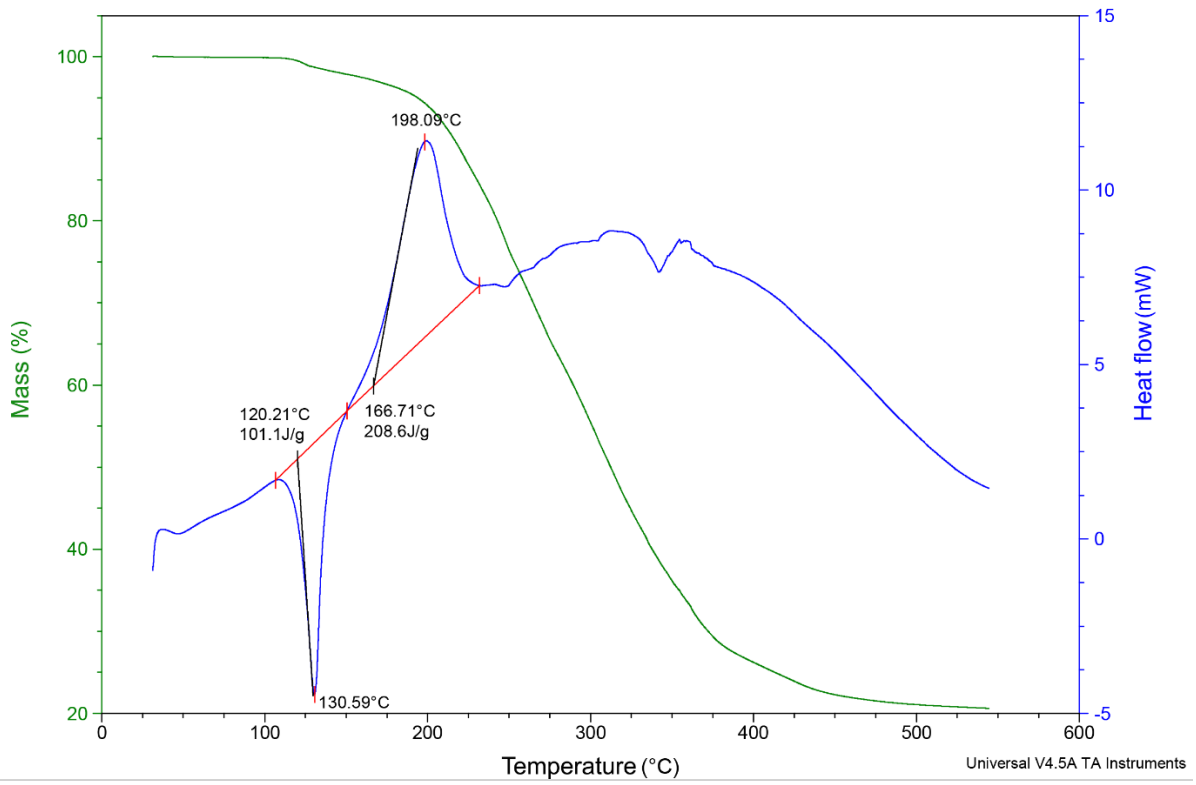

Figure S 7: DSC-TGA analysis of TvO under pure nitrogen flow at 100.0 ml/min.

## 2. Supplementary Tables

For previously determined structures<sup>1-6</sup> the numbering scheme was changed to be consistent with TvO and TvS

### 2.1. Geometrical parameters of the molecules

Table S 1: Selected bond lengths [Å] and angles [°] for the analysed compounds. ° Defined as an acute angle between least-square planes ( $S = P*X + Q*Y + R*Z$ ) of 6-membered benzene ring and 5-membered oxaborole ring

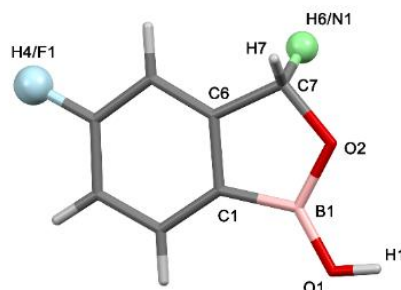

| Bond [Å]/<br>Angle [°] | Bx (P-1) |          | Bx (P2 <sub>1</sub> ) |          | Tv        |           | BxO       | BxS       | TvO       | TvS       |
|------------------------|----------|----------|-----------------------|----------|-----------|-----------|-----------|-----------|-----------|-----------|
|                        | a        | b        | a                     | b        | 100 K     | 298 K     |           |           |           |           |
| O1-H1                  | 1.02(7)  | 0.92(8)  | 0.90(5)               | 0.84(4)  | 0.83(2)   | 0.82      | 0.86(3)   | 0.76(2)   | 0.834(1)  | 0.79(3)   |
| B1-O1                  | 1.372(8) | 1.351(8) | 1.352(4)              | 1.348(5) | 1.349(1)  | 1.346(1)  | 1.353(2)  | 1.342(2)  | 1.342(1)  | 1.349(2)  |
| B1-O2                  | 1.407(8) | 1.412(8) | 1.401(5)              | 1.406(5) | 1.393(1)  | 1.388(1)  | 1.394(2)  | 1.387(2)  | 1.375(1)  | 1.372(2)  |
| B1-C1                  | 1.49(1)  | 1.54(1)  | 1.550(6)              | 1.560(6) | 1.553(1)  | 1.546(2)  | 1.565(3)  | 1.552(3)  | 1.557(1)  | 1.550(3)  |
| C1-C6                  | 1.405(8) | 1.407(8) | 1.406(4)              | 1.399(5) | 1.395(1)  | 1.393(1)  | 1.406(2)  | 1.394(3)  | 1.388(1)  | 1.388(3)  |
| C6-C7                  | 1.517(9) | 1.501(9) | 1.508(5)              | 1.512(5) | 1.503(1)  | 1.501(2)  | 1.517(2)  | 1.512(2)  | 1.508(1)  | 1.508(2)  |
| C7-O2                  | 1.457(7) | 1.448(8) | 1.456(4)              | 1.453(4) | 1.447(1)  | 1.446(1)  | 1.488(2)  | 1.491(2)  | 1.462(1)  | 1.469(2)  |
| C7-N1                  | -        | -        | -                     | -        | -         | -         | 1.438(2)  | 1.433(2)  | 1.429(1)  | 1.428(2)  |
| B1-O1-H1               | 115(4)   | 117(4)   | 111(3)                | 111(3)   | 115.1(1)  | 109       | 115.1(1)  | 117.3(1)  | 115.7(1)  | 115.9(1)  |
| O1-B1-O2               | 118.3(6) | 121.5(6) | 121.9(4)              | 122.3(4) | 121.52(1) | 121.51(1) | 122.88(1) | 122.96(1) | 123.96(1) | 124.01(1) |
| C1-B1-O1               | 118.3(6) | 130.5(6) | 130.1(3)              | 129.9(4) | 130.26(1) | 130.24(1) | 128.84(1) | 128.67(1) | 127.06(1) | 126.95(1) |
| C1-B1-O2               | 110.5(5) | 108.1(5) | 108.0(3)              | 107.8(3) | 108.22(1) | 108.25(1) | 108.28(1) | 108.39(1) | 108.96(1) | 109.06(1) |

|                          |          |          |          |          |           |           |           |           |           |           |
|--------------------------|----------|----------|----------|----------|-----------|-----------|-----------|-----------|-----------|-----------|
| <b>C7-O2-B1</b>          | 108.5(5) | 110.0(5) | 111.0(3) | 110.3(3) | 110.47(9) | 110.42(1) | 110.92(1) | 110.84(1) | 110.23(9) | 110.29(1) |
| <b>Fold <sup>a</sup></b> | 0.8(3)   | 0.7(4)   | 0.74(1)  | 0.92(1)  | 1.89(6)   | 1.54(8)   | 1.66(8)   | 2.63(9)   | 0.29(6)   | 0.33(9)   |

## 2.2. Hydrogen bonds geometry

Table S 2: Hydrogen bonds geometry for the analysed compounds based on calculations in Platon program<sup>7-9</sup>

| Compound                   | D   | H    | A       | d(D-H) [Å] | d(H-A) [Å] | d(D-A) [Å] | D-H-A [°] | Symmetry          |
|----------------------------|-----|------|---------|------------|------------|------------|-----------|-------------------|
| <b>Bx (P-1)</b>            | O1  | H1   | O2      | 1.02(7)    | 1.74(7)    | 2.752(7)   | 177(9)    | 2-x,2-y,-z        |
|                            | O1' | H1'  | O2'     | 0.92(8)    | 1.84(7)    | 2.757(7)   | 172(7)    | 3-x,2-y,1-z       |
|                            | C7  | H6   | O1      | 0.99(1)    | 2.745(7)   | 3.648(7)   | 152.0(7)  | x,-1+y,z          |
|                            | C7  | H7   | O1      | 1.00(1)    | 2.656(7)   | 3.285(7)   | 121.6(6)  | -1+x,-1+y,z       |
|                            | C7  | H7   | O1      | 1.00(1)    | 2.699(8)   | 3.464(8)   | 134.4(5)  | 1-x,2-y,-z        |
|                            | C7' | H6'  | O1'     | 1.00(1)    | 2.624(7)   | 3.283(7)   | 124.2(6)  | -1+x,-1+y,z       |
|                            | C7' | H6'  | O1'     | 1.00(1)    | 2.721(8)   | 3.475(8)   | 133.3(5)  | 2-x,2-y,1-z       |
|                            | C7' | H7'  | O1'     | 0.99(1)    | 2.749(8)   | 3.641(8)   | 150.1(7)  | x,-1+y,z          |
| C4                         | C4  | C3'  | 0.96(1) | 2.824(1)   |            | 143.9(7)   | -1+x,y,z  |                   |
| <b>Bx (P2<sub>1</sub>)</b> | O1  | H1   | O2'     | 0.90(5)    | 1.88(5)    | 2.767(3)   | 172(5)    | -x,1/2+y,-z       |
|                            | O1' | H1'  | O2      | 0.84(4)    | 1.92(4)    | 2.758(4)   | 178(5)    | -x,-1/2+y,-z      |
|                            | C7  | H6   | O1      | 0.97       | 2.74       | 3.257(4)   | 151       | x,y,1+z           |
|                            | C7  | H7   | O1      | 0.97       | 2.63       | 3.257(4)   | 123       | 1+x,y,1+z         |
|                            | C7  | H7   | O1'     | 0.97       | 2.67       | 3.417(5)   | 134       | 1-x,1/2+y,-z      |
|                            | C7' | H6'  | O1      | 0.97       | 2.71       | 3.451(5)   | 133       | 1-x,-1/2+y,-z     |
|                            | C7' | H7'  | O1'     | 0.97       | 2.75       | 3.272(4)   | 149       | x,y,1+z           |
|                            | C4  | H4   | C3'     | 0.93       | 2.83       |            | 143       | 1+x,y,z           |
| C3'                        | H3' | C3   | 0.93    | 2.85       |            | 161        |           |                   |
| <b>Tv (100K)</b>           | O1  | H1   | O2      | 0.83(2)    | 1.93(2)    | 2.762(3)   | 175(2)    | 2-x,2-y,1-z       |
|                            | C7  | H7   | O1      | 0.99       | 2.55       | 3.533(5)   | 172       | x,-1+y,z          |
|                            | C7  | H6   | O1      | 0.99       | 2.55       | 3.218(1)   | 155       | -1+x,-1+y,z       |
|                            | C3  | H3   | F1      | 0.95       | 2.58       | 3.478(5)   | 157       | -x,2-y,2-z        |
| <b>Tv (297K)</b>           | O1  | H1   | O2      | 0.82       | 1.96       | 2.774(4)   | 175       | -x,-y,1-z         |
|                            | C7  | H7   | O1      | 1.00       | 2.67       | 3.298(1)   | 150       | -1+x,y,z          |
|                            | C7  | H6   | O1      | 0.97       | 2.73       | 3.298(1)   | 118       | 1+x,1+y,z         |
|                            | C3  | H3   | F1      | 0.93       | 2.65       | 3.532(4)   | 158       | 2-x,-y,-z         |
| <b>BxO</b>                 | O1  | H1   | O2      | 0.86(3)    | 1.94(3)    | 2.797(1)   | 172(2)    | 1-x,2-y,-z        |
|                            | C7  | H7   | O1      | 1.00       | 2.67       | 3.575(2)   | 150       | -1+x,y,z          |
|                            | C11 | H11A | O3      | 0.99       | 2.64       | 3.309(2)   | 125       | -x,2-y,1-z        |
|                            | C5  | H5   | O3      | 0.95       | 2.60       | 3.440(2)   | 147       | -x,1-y,1-z        |
| <b>BxS</b>                 | O1  | H1   | O2      | 0.76(2)    | 1.97(2)    | 2.7284(6)  | 174(3)    | 2-x,1-y,-z        |
|                            | C5  | H5   | S1      | 0.95       | 2.83       | 3.6090(8)  | 140       | 1-x,-y,-z         |
|                            | C7  | H7   | O1      | 1.00       | 2.56       | 3.500(2)   | 157       | x,-1+y,z          |
|                            | C11 | H11A | O1      | 0.99       | 2.69       | 3.548(2)   | 145       | x,1+y,z           |
|                            | C10 | H10A | S1      | 0.99       | 3.00       | 3.868      | 147       | 3/2-x,1/2+y,1/2-z |
| <b>TvO</b>                 | O1  | H1   | O3      | 0.83(1)    | 1.971(8)   | 2.7613(3)  | 158.6(8)  | 1-x,2-y,1-z       |
|                            | C2  | H2   | O1      | 0.93       | 2.51       | 3.3979(6)  | 159       | 2-x,1-y,1-z       |
|                            | C8  | H8A  | F1      | 0.97       | 2.60       | 3.253(1)   | 160       | 1-x,1-y,-z        |
|                            | C10 | H10B | F1      | 0.97       | 2.66       | 3.573(1)   | 156       | -x,1-y,-z         |
|                            | C11 | H11B | O1      | 0.97       | 2.98       | 3.831(1)   | 147       | -1+x,y,z          |
| <b>TvS</b>                 | O1  | H1   | S1      | 0.79(3)    | 2.56(3)    | 3.3336(4)  | 169(2)    | 1-x,-1/2+y,1/2-z  |

|     |      |    |         |          |          |           |                      |
|-----|------|----|---------|----------|----------|-----------|----------------------|
| C7  | H7   | O1 | 0.99(1) | 2.840(1) | 3.766(2) | 119.20(1) | $x, -1+y, z$         |
| C11 | H11B | O1 | 0.97    | 2.74     | 3.679(2) | 165       | $x, 1+y, z$          |
| C10 | H10A | O2 | 0.97    | 2.71     | 3.391(2) | 127       | $1-x, -1/2+y, 1/2-z$ |
| C10 | H10B | F1 | 0.97    | 2.75     | 3.653(1) | 156       | $2-x, 1-y, 1-z$      |



### 2.3. Hydrogen Bond Propensity Calculations<sup>10,11</sup>

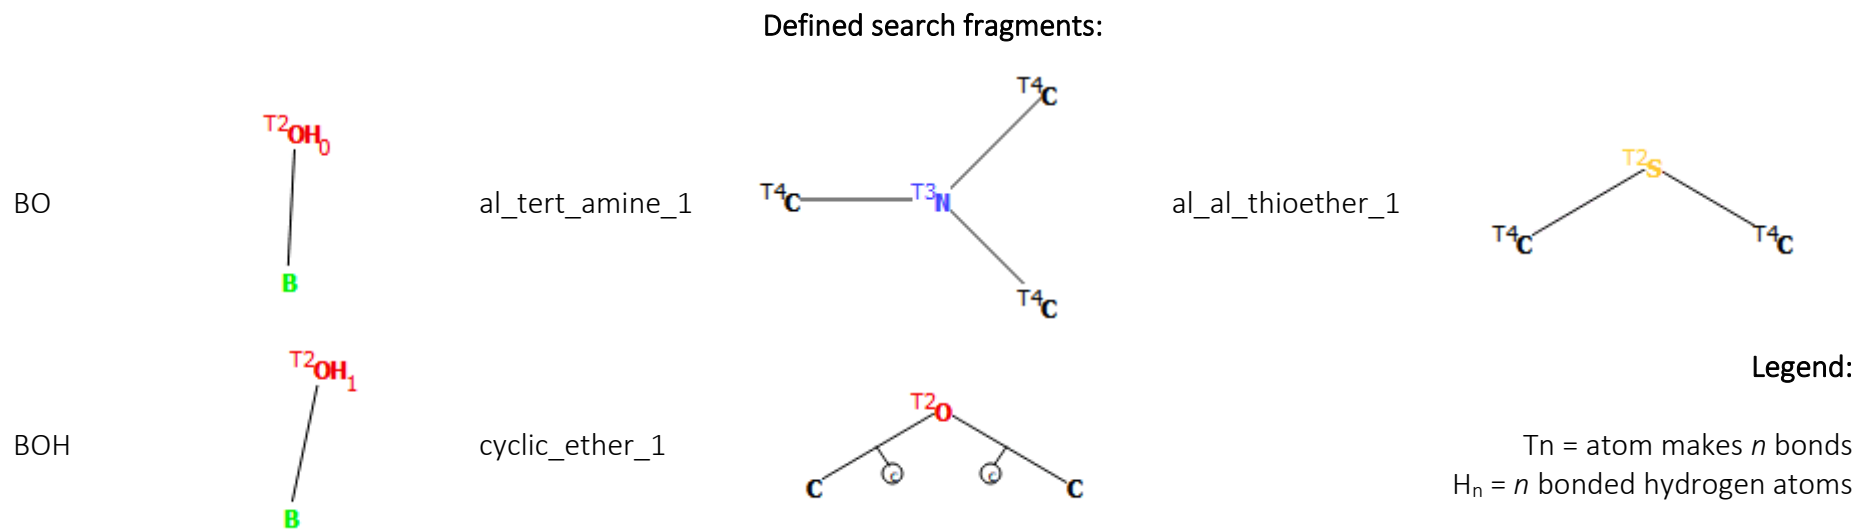

Table S 3: Predicted intermolecular hydrogen bond propensities of Bx (P-1)

| Donor     | Acceptor  | Competition | Donor steric density | Acceptor steric density | Donor aromaticity | Acceptor aromaticity | Propensity | Lower bound | Upper bound | Frequency | Observed Inter-? |
|-----------|-----------|-------------|----------------------|-------------------------|-------------------|----------------------|------------|-------------|-------------|-----------|------------------|
| O2 of BOH | O1 of BO  | 3.00        | 36.94                | 42.63                   | 0.55              | 0.55                 | 0.67       | 0.58        | 0.76        | -         | observed         |
| O2 of BOH | O3 of BO  | 3.00        | 36.94                | 42.63                   | 0.55              | 0.55                 | 0.67       | 0.58        | 0.76        | -         |                  |
| O4 of BOH | O1 of BO  | 3.00        | 36.94                | 42.63                   | 0.55              | 0.55                 | 0.67       | 0.58        | 0.76        | -         |                  |
| O4 of BOH | O3 of BO  | 3.00        | 36.94                | 42.63                   | 0.55              | 0.55                 | 0.67       | 0.58        | 0.76        | -         | observed         |
| O2 of BOH | O2 of BOH | 3.00        | 36.94                | 36.94                   | 0.55              | 0.55                 | 0.47       | 0.34        | 0.60        | -         |                  |
| O2 of BOH | O4 of BOH | 3.00        | 36.94                | 36.94                   | 0.55              | 0.55                 | 0.47       | 0.34        | 0.60        | -         |                  |
| O4 of BOH | O2 of BOH | 3.00        | 36.94                | 36.94                   | 0.55              | 0.55                 | 0.47       | 0.34        | 0.60        | -         |                  |
| O4 of BOH | O4 of BOH | 3.00        | 36.94                | 36.94                   | 0.55              | 0.55                 | 0.47       | 0.34        | 0.60        | -         |                  |

Table S 4: Predicted intermolecular hydrogen bond propensities of Bx (P2<sub>1</sub>)

| Donor     | Acceptor  | Competition | Donor steric density | Acceptor steric density | Donor aromaticity | Acceptor aromaticity | Propensity | Lower bound | Upper bound | Frequency | Observed Inter-? |
|-----------|-----------|-------------|----------------------|-------------------------|-------------------|----------------------|------------|-------------|-------------|-----------|------------------|
| O2 of BOH | O1 of BO  | 3.00        | 36.94                | 42.63                   | 0.55              | 0.55                 | 0.67       | 0.58        | 0.76        | -         |                  |
| O2 of BOH | O3 of BO  | 3.00        | 36.94                | 42.63                   | 0.55              | 0.55                 | 0.67       | 0.58        | 0.76        | -         | observed         |
| O4 of BOH | O1 of BO  | 3.00        | 36.94                | 42.63                   | 0.55              | 0.55                 | 0.67       | 0.58        | 0.76        | -         | observed         |
| O4 of BOH | O3 of BO  | 3.00        | 36.94                | 42.63                   | 0.55              | 0.55                 | 0.67       | 0.58        | 0.76        | -         |                  |
| O2 of BOH | O2 of BOH | 3.00        | 36.94                | 36.94                   | 0.55              | 0.55                 | 0.47       | 0.34        | 0.60        | -         |                  |
| O2 of BOH | O4 of BOH | 3.00        | 36.94                | 36.94                   | 0.55              | 0.55                 | 0.47       | 0.34        | 0.60        | -         |                  |
| O4 of BOH | O2 of BOH | 3.00        | 36.94                | 36.94                   | 0.55              | 0.55                 | 0.47       | 0.34        | 0.60        | -         |                  |
| O4 of BOH | O4 of BOH | 3.00        | 36.94                | 36.94                   | 0.55              | 0.55                 | 0.47       | 0.34        | 0.60        | -         |                  |

Table S 5: Predicted intermolecular hydrogen bond propensities of Tv

| Donor     | Acceptor  | Competition | Donor steric density | Acceptor steric density | Donor aromaticity | Acceptor aromaticity | Propensity | Lower bound | Upper bound | Frequency | Observed Inter-? |
|-----------|-----------|-------------|----------------------|-------------------------|-------------------|----------------------|------------|-------------|-------------|-----------|------------------|
| O2 of BOH | O1 of BO  | 1.50        | 36.94                | 42.71                   | 0.50              | 0.50                 | 0.67       | 0.58        | 0.74        | 60.2      | observed         |
| O2 of BOH | O2 of BOH | 1.50        | 36.94                | 36.94                   | 0.50              | 0.50                 | 0.46       | 0.34        | 0.59        | 39.1      |                  |

Table S 6: Predicted intermolecular hydrogen bond propensities of BxO

| Donor     | Acceptor              | Competition | Donor steric density | Acceptor steric density | Donor aromaticity | Acceptor aromaticity | Propensity | Lower bound | Upper bound | Frequency | Observed Inter-? |
|-----------|-----------------------|-------------|----------------------|-------------------------|-------------------|----------------------|------------|-------------|-------------|-----------|------------------|
| O1 of BOH | O2 of BO              | 2.00        | 43.02                | 68.51                   | 0.33              | 0.33                 | 0.60       | 0.51        | 0.69        | -         | observed         |
| O1 of BOH | O1 of BOH             | 2.00        | 43.02                | 43.02                   | 0.33              | 0.33                 | 0.58       | 0.48        | 0.67        | -         |                  |
| O1 of BOH | O3 of cyclic_ether_1  | 2.00        | 43.02                | 43.30                   | 0.33              | 0.33                 | 0.27       | 0.20        | 0.35        | -         |                  |
| O1 of BOH | N1 of al_tert_amine_1 | 4.00        | 43.02                | 73.20                   | 0.33              | 0.33                 | 0.24       | 0.20        | 0.30        | -         |                  |

Table S 7: Predicted intermolecular hydrogen bond propensities of BxS

| Donor     | Acceptor                | Competition | Donor steric density | Acceptor steric density | Donor aromaticity | Acceptor aromaticity | Propensity | Lower bound | Upper bound | Frequency | Observed Inter-? |
|-----------|-------------------------|-------------|----------------------|-------------------------|-------------------|----------------------|------------|-------------|-------------|-----------|------------------|
| O1 of BOH | O1 of BOH               | 2.00        | 43.02                | 43.02                   | 0.33              | 0.33                 | 0.64       | 0.56        | 0.71        | -         |                  |
| O1 of BOH | O2 of BO                | 2.00        | 43.02                | 68.69                   | 0.33              | 0.33                 | 0.61       | 0.53        | 0.68        | -         | observed         |
| O1 of BOH | N1 of al_tert_amine_1   | 4.00        | 43.02                | 73.62                   | 0.33              | 0.33                 | 0.27       | 0.21        | 0.34        | -         |                  |
| O1 of BOH | S1 of al_al_thioether_1 | 2.00        | 43.02                | 43.30                   | 0.33              | 0.33                 | 0.09       | 0.08        | 0.10        | -         |                  |

Table S 8: Predicted intermolecular hydrogen bond propensities of TvO

| Donor     | Acceptor              | Competition | Donor steric density | Acceptor steric density | Donor aromaticity | Acceptor aromaticity | Propensity | Lower bound | Upper bound | Frequency | Observed Inter-? |
|-----------|-----------------------|-------------|----------------------|-------------------------|-------------------|----------------------|------------|-------------|-------------|-----------|------------------|
| O1 of BOH | O2 of BO              | 2.00        | 43.02                | 68.60                   | 0.32              | 0.32                 | 0.61       | 0.52        | 0.70        | -         |                  |
| O1 of BOH | O1 of BOH             | 2.00        | 43.02                | 43.02                   | 0.32              | 0.32                 | 0.59       | 0.49        | 0.68        | -         |                  |
| O1 of BOH | O3 of cyclic_ether_1  | 2.00        | 43.02                | 43.30                   | 0.32              | 0.32                 | 0.27       | 0.20        | 0.36        | -         | observed         |
| O1 of BOH | N1 of al_tert_amine_1 | 4.00        | 43.02                | 73.28                   | 0.32              | 0.32                 | 0.25       | 0.20        | 0.31        | -         |                  |

Table S 9: Predicted intermolecular hydrogen bond propensities of TvS

| Donor     | Acceptor                | Competition | Donor steric density | Acceptor steric density | Donor aromaticity | Acceptor aromaticity | Propensity | Lower bound | Upper bound | Frequency | Observed Inter-? |
|-----------|-------------------------|-------------|----------------------|-------------------------|-------------------|----------------------|------------|-------------|-------------|-----------|------------------|
| O1 of BOH | O1 of BOH               | 2.00        | 43.02                | 43.02                   | 0.32              | 0.32                 | 0.65       | 0.57        | 0.72        | -         |                  |
| O1 of BOH | O2 of BO                | 2.00        | 43.02                | 68.77                   | 0.32              | 0.32                 | 0.61       | 0.54        | 0.68        | -         |                  |
| O1 of BOH | N1 of al_tert_amine_1   | 4.00        | 43.02                | 73.70                   | 0.32              | 0.32                 | 0.27       | 0.21        | 0.34        | -         |                  |
| O1 of BOH | S1 of al_al_thioether_1 | 2.00        | 43.02                | 43.30                   | 0.32              | 0.32                 | 0.09       | 0.08        | 0.10        | -         | observed         |

## 2.4. Aromatic interactions geometry

### 2.4.1. X $\cdots\pi$ interactions

Table S 10: Important X $\cdots\pi$  interactions found in the analysed compounds. <sup>a</sup> Cg = centre of gravity of an aromatic ring found by Platon automatic search for rings<sup>7-9</sup>, Cg1 – 5-membered ring, Cg2 – 6-membered ring, Cg3 – 9-membered ring. <sup>b</sup> an angle between Cg-X vector and a normal to the Cg ring plane

| Compound                        | Y-X $\cdots\pi$ bond  | Distance X $\cdots$ Cg <sup>a</sup> [Å] | Gamma <sup>b</sup> [°] | Y-X $\cdots\pi$ angle [Å] | Symmetry           |
|---------------------------------|-----------------------|-----------------------------------------|------------------------|---------------------------|--------------------|
| <b>Bx</b> (P-1), a-b            | C3-H3' $\cdots$ C3    | 2.866(1)                                | -                      | 160.8(7)                  | -                  |
| <b>Bx</b> (P2 <sub>1</sub> ), a | C4-H4' $\cdots$ C3'   | 2.83                                    | -                      | 143.00                    | 1+x,y,z            |
| <b>Bx</b> (P2 <sub>1</sub> ), b | C12-H11' $\cdots$ C5  | 2.85                                    | -                      | 161.00                    | -                  |
| <b>Tv</b> (100K)                | C4-F1' $\cdots$ Cg2   | 3.591(1)                                | 15.40                  | 74.39(6)                  | -1+x, y, z         |
|                                 | C4-F1' $\cdots$ Cg3   | 3.892(1)                                | 26.85                  | 62.55(6)                  | -1+x, y, z         |
| <b>Tv</b> (297K)                | C4-F1' $\cdots$ Cg2   | 3.644(1)                                | 12.84                  | 77.10(9)                  | 1+x, y, z          |
|                                 | C4-F1' $\cdots$ Cg3   | 3.911(1)                                | 24.52                  | 65.20(8)                  | 1+x, y, z          |
| <b>BxO</b>                      | C9-H10b' $\cdots$ Cg2 | 2.84                                    | 11.65                  | 146.00                    | 1-x, 1-y, 1-z      |
| <b>BxS</b>                      | C9-H9B' $\cdots$ Cg2  | 2.84                                    | 14.88                  | 141.00                    | 1-x,1-y,-z         |
|                                 | C2-H2' $\cdots$ Cg2   | 2.74                                    | 9.89                   | 136.00                    | 3/2-x,1/2+y,-1/2-z |
| <b>TvO</b>                      | C4-F1' $\cdots$ Cg3   | 3.785(1)                                | 20.75                  | 109.63(8)                 | 1-x,1-y,-z         |
| <b>TvS</b>                      | C4-F1' $\cdots$ Cg2   | 3.519(1)                                | 6.66                   | 91.50(1)                  | 2-x,1-y,1-z        |

### 2.4.2. $\pi\cdots\pi$ interactions

Table S 11: Important  $\pi\cdots\pi$  interactions found in the analysed compounds. <sup>a</sup> Cg = centre of gravity of an aromatic ring found by Platon automatic search for rings<sup>7-9</sup>, Cg1 – 5-membered ring, Cg2 – 6-membered ring, Cg3 – 9-membered ring. <sup>b</sup> an angle between Cg(I) and Cg(J) vector and normal to plane J, <sup>c</sup> a distance between Cg(I) and perpendicular projection of Cg(J) on ring (I)

| Compound                        | Cg $\cdots$ Cg bond | Distance Cg $\cdots$ Cg <sup>a</sup> [Å] | Gamma <sup>b</sup> [°] | Slippage <sup>c</sup> [Å] | Symmetry    |
|---------------------------------|---------------------|------------------------------------------|------------------------|---------------------------|-------------|
| <b>Bx</b> (P-1), a              | Cg1 $\cdots$ Cg2    | 3.698(4)                                 | 16.7                   | 1.099                     | 1+x, y, z   |
| <b>Bx</b> (P-1), b              | Cg1' $\cdots$ Cg2'  | 3.705(4)                                 | 17.0                   | 1.126                     | 1+x, y, z   |
| <b>Bx</b> (P2 <sub>1</sub> ), a | Cg1 $\cdots$ Cg2    | 3.683(2)                                 | 16.8                   | 1.109                     | -1+x, y, z  |
| <b>Bx</b> (P2 <sub>1</sub> ), b | Cg1' $\cdots$ Cg2'  | 3.686(2)                                 | 16.9                   | 1.127                     | -1+x, y, z  |
| <b>Tv</b> (100K)                | Cg1 $\cdots$ Cg3    | 3.5442(7)                                | 14.6                   | 0.947                     | 1+x, y, z   |
| <b>Tv</b> (297K)                | Cg1 $\cdots$ Cg2    | 3.6658(9)                                | 16.0                   | 1.016                     | -1+x, y, z  |
| <b>BxO</b>                      | Cg3 $\cdots$ Cg3    | 3.768(1)                                 | 22.9                   | 1.467                     | 1-x,1-y,-z  |
| <b>BxS</b>                      | -                   | -                                        | -                      | -                         | -           |
| <b>TvO</b>                      | Cg1 $\cdots$ Cg1    | 3.905(1)                                 | 30.0                   | 1.955                     | 1-x,1-y,1-z |
| <b>TvS</b>                      | Cg2 $\cdots$ Cg2    | 4.493(1)                                 | 39.2                   | 2.838                     | 2-x,2-y,1-z |

### 2.4.3. Aromatic Analyzer calculation results <sup>12</sup>

Table S 12: Results of Aromatic Analyzer calculations for **Bx** (P-1), molecule a

| Distance (Å) | Relative Orientation (°) | Score | Assessment |
|--------------|--------------------------|-------|------------|
| 4.53         | 0                        | 8.2   | Strong     |
| 5.47         | 71.63                    | 6.2   | Moderate   |
| 6.16         | 0                        | 5.5   | Moderate   |
| 5.6          | 71.63                    | 5.2   | Moderate   |
| 6.8          | 0                        | 3.5   | Moderate   |

Table S 13 Results of Aromatic Analyzer calculations for **Bx** (P-1), molecule b

| Distance (Å) | Relative Orientation (°) | Score | Assessment |
|--------------|--------------------------|-------|------------|
| 4.53         | 0                        | 8.1   | Strong     |
| 5.47         | 71.63                    | 6.2   | Moderate   |
| 6.16         | 0                        | 5.6   | Moderate   |
| 5.6          | 71.63                    | 5.2   | Moderate   |
| 6.8          | 0                        | 3.4   | Moderate   |

Table S 14: Results of Aromatic Analyzer calculations for **Bx** (P2<sub>1</sub>)

| Distance (Å) | Relative Orientation (°) | Score | Assessment |
|--------------|--------------------------|-------|------------|
| 4.54         | 0                        | 8.2   | Strong     |
| 5.43         | 72.87                    | 6.2   | Moderate   |
| 6.14         | 0                        | 5.6   | Moderate   |
| 5.56         | 72.87                    | 5.2   | Moderate   |
| 6.78         | 0                        | 3.4   | Moderate   |

Table S 15: Results of Aromatic Analyzer calculations for **Tv** (100K)

| Distance (Å) | Relative Orientation (°) | Score | Assessment |
|--------------|--------------------------|-------|------------|
| 3.88         | 0                        | 10    | Strong     |
| 5.79         | 0                        | 6.3   | Moderate   |
| 6.31         | 0                        | 4.9   | Moderate   |
| 6.74         | 0                        | 3.7   | Moderate   |
| 6.78         | 0                        | 3.2   | Moderate   |

Table S 16: Results of Aromatic Analyzer calculations for Tv (298K)

| Distance (Å) | Relative Orientation (°) | Score | Assessment |
|--------------|--------------------------|-------|------------|
| 4.03         | 0                        | 9.6   | Strong     |
| 5.85         | 0                        | 6.1   | Moderate   |
| 6.32         | 0                        | 4.8   | Moderate   |
| 6.81         | 0                        | 3.4   | Moderate   |
| 6.84         | 0                        | 3.1   | Moderate   |

Table S 17: Results of Aromatic Analyzer calculations for BxO

| Distance (Å) | Relative Orientation (°) | Score | Assessment |
|--------------|--------------------------|-------|------------|
| 4.06         | 0                        | 9.8   | Strong     |
| 5.99         | 0                        | 6     | Moderate   |

Table S 18: Results of Aromatic Analyzer calculations for BxS

| Distance (Å) | Relative Orientation (°) | Score | Assessment |
|--------------|--------------------------|-------|------------|
| 4.72         | 52.59                    | 8.5   | Strong     |
| 6.02         | 0                        | 5.9   | Moderate   |

Table S 19: Results of Aromatic Analyzer calculations for TvO

| Distance (Å) | Relative Orientation (°) | Score | Assessment |
|--------------|--------------------------|-------|------------|
| 4.75         | 0                        | 7.5   | Strong     |
| 5.5          | 0                        | 6     | Moderate   |
| 6.12         | 0                        | 5.1   | Moderate   |

Table S 20: Results of Aromatic Analyzer calculations for TvS

| Distance (Å) | Relative Orientation (°) | Score | Assessment |
|--------------|--------------------------|-------|------------|
| 4.49         | 0                        | 8.3   | Strong     |
| 6.27         | 0                        | 4.9   | Moderate   |

## 2.5. Calculated interaction energies

Interaction energies have been calculated using CrystalExplorer21 software (version 21.5)<sup>13</sup> using CE-B3LYP ... B3LYP/6-31G(d,p) electron densities energy model. Total energies ( $E_{tot}$ ) are the sum of the four energy components, scaled appropriately with scale factors for benchmarked energy models according to Mackenzie et al.<sup>14</sup>:

$$E_{tot} = E_{ele} \times k_{ele} + E_{pol} \times k_{pol} + E_{dis} \times k_{dis} + E_{rep} \times k_{rep}$$

$E_{ele}$  electrostatic energy,  $E_{pol}$  polarization energy,  $E_{dis}$  dispersion energy,  $E_{rep}$  repulsion energy

$k_{ele}$  1.057,  $k_{pol}$  0.74,  $k_{disp}$  0.871 and  $k_{rep}$  0.618

Table S 21: Interaction Energies [kJ/mol] for compound **Bx** (P-1), Molecules *a* and *b* have approximately the same energy values. <sup>a</sup> the distance between molecular centroids (mean atomic position) in Å

| N | Symmetry operation | R <sup>a</sup> | E <sub>ele</sub> | E <sub>pol</sub> | E <sub>dis</sub> | E <sub>rep</sub> | E <sub>tot</sub> |
|---|--------------------|----------------|------------------|------------------|------------------|------------------|------------------|
| 1 | 3-x, 2-y, 1-z      | 7.1            | -85              | -18              | -16              | 95               | -58              |
| 2 | 1+x, y, z          | 4.5            | -2               | -1               | -29              | 14               | -20              |
| 1 | 2-x, 2-y, 1-z      | 5.4            | -4               | -1               | -19              | 11               | -15              |
| 2 | 1+x, 1+y, z        | 6.2            | -4               | -1               | -14              | 9                | -11              |
| 2 | x, 1+ y, z         | 6.8            | -4               | -1               | -13              | 10               | -10              |

Table S 22: Interaction Energies [kJ/mol] for compound **Bx** (P2<sub>1</sub>), Molecules *a* and *b* have approximately the same energy values. <sup>a</sup> the distance between molecular centroids (mean atomic position) in Å

| N | Symmetry operation | R <sup>a</sup> | E <sub>ele</sub> | E <sub>pol</sub> | E <sub>dis</sub> | E <sub>rep</sub> | E <sub>tot</sub> |
|---|--------------------|----------------|------------------|------------------|------------------|------------------|------------------|
| 1 | -                  | 7.1            | -83              | -17              | -16              | 95               | -56              |
| 2 | 1+x, y, z          | 4.5            | -2               | -1               | -29              | 14               | -19              |
| 1 | -                  | 5.4            | -5               | -1               | -21              | 13               | -17              |
| 2 | 1+x, y, 1+z        | 6.1            | -4               | -1               | -14              | 10               | -11              |
| 2 | x, y, 1+z          | 6.8            | -5               | -2               | -13              | 11               | -11              |

Table S 23: Interaction Energies [kJ/mol] for compound **Tv** (100K). <sup>a</sup> the distance between molecular centroids (mean atomic position) in Å

| N | Symmetry operation | R <sup>a</sup> | E <sub>ele</sub> | E <sub>pol</sub> | E <sub>dis</sub> | E <sub>rep</sub> | E <sub>tot</sub> |
|---|--------------------|----------------|------------------|------------------|------------------|------------------|------------------|
| 1 | 2-x, 2-y, 1-z      | 8.0            | -83.2            | -17.2            | -16.0            | 94.4             | -56.2            |
| 2 | 1+x, y, z          | 3.9            | -3.7             | -1.0             | -44.0            | 25.7             | -27.1            |
| 2 | x, -1+y, z         | 6.8            | -6.9             | -1.9             | -14.6            | 12.6             | -13.7            |
| 2 | -1+x, -1+y, z      | 6.3            | -6.6             | -1.1             | -11.2            | 9.4              | -11.8            |
| 1 | 1-x, 2-y, 2-z      | 8.5            | -5.2             | -0.5             | -8.1             | 7.7              | -8.2             |
| 1 | -x, 2-y, 2-z       | 7.3            | -1.7             | -0.2             | -11.2            | 5.8              | -8.1             |

Table S 24: Interaction Energies [kJ/mol] for compound **Tv** (298K). <sup>a</sup> the distance between molecular centroids (mean atomic position) in Å

| N | Symmetry operation | R <sup>a</sup> | E <sub>ele</sub> | E <sub>pol</sub> | E <sub>dis</sub> | E <sub>rep</sub> | E <sub>tot</sub> |
|---|--------------------|----------------|------------------|------------------|------------------|------------------|------------------|
| 1 | 2-x, 2-y, 1-z      | 8.0            | -78.9            | -16.1            | -16              | 90.8             | -53.2            |
| 2 | 1+x, y, z          | 4.0            | -1.6             | -0.8             | -37.8            | 17.2             | -24.6            |

|   |               |     |      |      |       |     |       |
|---|---------------|-----|------|------|-------|-----|-------|
| 2 | x, -1+y, z    | 6.8 | -6.3 | -1.7 | -12.6 | 9.1 | -13.3 |
| 2 | -1+x, -1+y, z | 6.3 | -5.6 | -1   | -10.7 | 7.6 | -11.3 |
| 1 | -x, 2-y, 2-z  | 8.5 | -4.7 | -0.5 | -7.5  | 6.2 | -8.0  |

Table S 25: Interaction Energies [kJ/mol] for compound **BxO**. <sup>a</sup> the distance between molecular centroids (mean atomic position) in Å

| N | Symmetry operation | R <sup>a</sup> | E <sub>ele</sub> | E <sub>pol</sub> | E <sub>dis</sub> | E <sub>rep</sub> | E <sub>tot</sub> |
|---|--------------------|----------------|------------------|------------------|------------------|------------------|------------------|
| 1 | 1-x, 2-y, -z       | 6.9            | -80.2            | -16.9            | -25.8            | 89.7             | -64.4            |
| 1 | -x, 1-y, 1-z       | 6.6            | -15.7            | -2.3             | -41.9            | 33.7             | -34.0            |
| 1 | 1-x, 1-y, -z       | 6.8            | -2.1             | -1.4             | -41.8            | 22.6             | -25.7            |
| 1 | 1-x, 1-y, 1-z      | 5.8            | -6.8             | -1.7             | -37.8            | 26.6             | -24.9            |
| 2 | 1+x, y, z          | 6.0            | -5.5             | -1.3             | -30.7            | 17.7             | -22.6            |

Table S 26: Interaction Energies [kJ/mol] for compound **BxS**. <sup>a</sup> the distance between molecular centroids (mean atomic position) in Å

| N | Symmetry operation    | R <sup>a</sup> | E <sub>ele</sub> | E <sub>pol</sub> | E <sub>dis</sub> | E <sub>rep</sub> | E <sub>tot</sub> |
|---|-----------------------|----------------|------------------|------------------|------------------|------------------|------------------|
| 1 | 2-x, 1-y, -z          | 6.9            | -95.2            | -20.9            | -29.3            | 118.8            | -68.2            |
| 1 | 1-x, 1-y, -z          | 5.6            | -10.1            | -1.8             | -41.0            | 30.8             | -28.7            |
| 1 | 1-x, -y, -z           | 6.4            | -18.9            | -2.8             | -34.8            | 40.9             | -27.1            |
| 2 | x, 1+y, z             | 6.0            | -7.9             | -1.4             | -32.0            | 21.2             | -24.1            |
| 2 | 3/2-x, -1/2+y, -1/2-z | 8.2            | -3.9             | -1.0             | -25.7            | 15.9             | -17.4            |
| 2 | 3/2-x, 1/2+y, 1/2-z   | 9.5            | -2.6             | -0.6             | -10.9            | 6.7              | -8.5             |
| 1 | 2-x, 1-y, -z          | 7.5            | -0.4             | -0.1             | -6.2             | 0.1              | -5.8             |

Table S 27: Interaction Energies [kJ/mol] for compound **TvO**. <sup>a</sup> the distance between molecular centroids (mean atomic position) in Å

| N | Symmetry operation | R <sup>a</sup> | E <sub>ele</sub> | E <sub>pol</sub> | E <sub>dis</sub> | E <sub>rep</sub> | E <sub>tot</sub> |
|---|--------------------|----------------|------------------|------------------|------------------|------------------|------------------|
| 1 | 1-x, 2-y, 1-z      | 6.8            | -79.0            | -16.8            | -33.0            | 85.5             | -72.0            |
| 1 | 1-x, 1-y, 1-z      | 6.2            | -6.5             | -1.0             | -40.8            | 20.0             | -30.8            |
| 1 | 1-x, 1-y, -z       | 6.6            | -3.9             | -1.1             | -29.6            | 13.7             | -22.1            |
| 2 | 1+x, y, z          | 6.1            | -2.8             | -1.1             | -28.8            | 12.4             | -21.2            |
| 1 | -x, 1-y, -z        | 8.8            | -4.0             | -0.4             | -15.9            | 9.9              | -12.2            |
| 1 | 2-x, 1-y, 1-z      | 6.9            | -2.1             | -0.8             | -16.4            | 8.6              | -11.8            |
| 1 | 1-x, 2-y, 1-z      | 9.3            | -10.1            | -2.1             | -11.0            | 17.6             | -10.9            |

Table S 28: Interaction Energies [kJ/mol] for compound **TvS**. <sup>a</sup> the distance between molecular centroids (mean atomic position) in Å

| N | Symmetry operation | R <sup>a</sup> | E <sub>ele</sub> | E <sub>pol</sub> | E <sub>dis</sub> | E <sub>rep</sub> | E <sub>tot</sub> |
|---|--------------------|----------------|------------------|------------------|------------------|------------------|------------------|
| 2 | -x, y+1/2, -z+1/2  | 7.5            | -31.8            | -5.2             | -22.1            | 40.7             | -31.5            |
| 1 | 2-x, 1-y, 1-z      | 6.8            | -2.7             | -1.1             | -34.6            | 16.2             | -23.8            |
| 2 | x, 1+y, z          | 6.3            | -5.7             | -1.3             | -27.9            | 15.0             | -22.0            |
| 2 | 2-x, 1/2+y, 1/2-z  | 7.5            | -2.7             | -1.2             | -19.2            | 8.9              | -15.0            |
| 1 | 2-x, 2-y, 1-z      | 7.0            | -2.9             | -0.9             | -18.3            | 8.0              | -14.7            |
| 1 | 1-x, 2-y, 1-z      | 8.9            | -4.9             | -1.0             | -10.8            | 8.7              | -10.0            |



Table S 29: Total lattice energies [kJ/mol] for all the analysed structures

| <b>Compound</b>  | <b>E<sub>lattice</sub></b> |
|------------------|----------------------------|
| <b>Bx (P-1)</b>  | -94                        |
| <b>Bx(P21)</b>   | -88.5                      |
| <b>Tv (100K)</b> | -78.7                      |
| <b>Tv (293K)</b> | -74.2                      |
| <b>BxO</b>       | -132.8                     |
| <b>BxS</b>       | -131.6                     |
| <b>TvO</b>       | -127.3                     |
| <b>TvS</b>       | -119.1                     |

### 3. References

- 1 V. V. Zhdankin, P. J. Persichini, L. Zhang, S. Fix and P. Kiprof, *Tetrahedron Lett.*, 1999, **40**, 6705–6708.
- 2 A. Adamczyk-Woźniak, M. K. Cyrański, M. Jakubczyk, P. Klimentowska, A. Koll, J. Kołodziejczak, G. Pojmaj, A. Zubrowska, G. Z. Zukowska and A. Sporzyński, *J. Phys. Chem. A*, 2010, **114**, 2324–2330.
- 3 I. D. Madura, A. Adamczyk-Woźniak, M. Jakubczyk and A. Sporzyński, *Acta Crystallogr. Sect. E Struct. Reports Online*, 2011, **67**, o414–o415.
- 4 S. Sene, D. Berthomieu, B. Donnadiou, S. Richeter, J. Vezzani, D. Granier, S. Bégu, H. Mutin, C. Gervais and D. Laurencin, *CrystEngComm*, 2014, **16**, 4999–5011.
- 5 A. Sporzyński, M. Lewandowski, P. Rogowska and M. K. Cyrański, *Appl. Organomet. Chem.*, 2005, **19**, 1202–1203.
- 6 A. Adamczyk-Woźniak, I. Madura, A. H. Velders and A. Sporzyński, *Tetrahedron Lett.*, 2010, **51**, 6181–6185.
- 7 A. L. Spek and IUCr, *urn:issn:0021-8898*, 2003, **36**, 7–13.
- 8 A. L. Spek, *urn:issn:0907-4449*, 2009, **65**, 148–155.
- 9 A. L. Spek, *urn:issn:2053-2296*, 2015, **71**, 9–18.
- 10 S. R. Chemburkar, J. Bauer, K. Deming, H. Spiwek, K. Patel, J. Morris, R. Henry, S. Spanton, W. Dziki, W. Porter, J. Quick, P. Bauer, J. Donaubauer, B. A. Narayanan, M. Soldani, D. Riley and K. McFarland, *Org. Process Res. Dev.*, 2000, **4**, 413–417.
- 11 P. T. A. Galek, F. H. Allen, L. Fábíán and N. Feeder, *CrystEngComm*, 2009, **11**, 2634–2639.
- 12 C. F. MacRae, I. Sovago, S. J. Cottrell, P. T. A. Galek, P. McCabe, E. Pidcock, M. Platings, G. P. Shields, J. S. Stevens, M. Towler and P. A. Wood, *J. Appl. Crystallogr.*, 2020, **53**, 226–235.
- 13 P. R. Spackman, M. J. Turner, J. J. McKinnon, S. K. Wolff, D. J. Grimwood, D. Jayatilaka and M. A. Spackman, *J. Appl. Crystallogr.*, 2021, **54**, 1006–1011.
- 14 C. F. Mackenzie, P. R. Spackman, D. Jayatilaka and M. A. Spackman, *IUCrJ*, 2017, **4**, 575–587.
